# Supplementary material
Source: PubMed Central journal article supplement (PMC10992444)
Supplement: 262_2021_3100_MOESM2_ESM.pdf [file 262_2021_3100_MOESM2_ESM.pdf]

**Supplementary Table 1.** Baseline characteristics of patients with available *HER2* variant

| Variables                                      | All (%)<br>(N = 22) | <i>HER2</i> variant |                     | <i>P</i> |
|------------------------------------------------|---------------------|---------------------|---------------------|----------|
|                                                |                     | Group a<br>(N = 9)  | Group b<br>(N = 13) |          |
| Median age, years (range)                      | 55 (38-69)          | 58 (38-68)          | 53 (40-69)          |          |
| Gender                                         |                     |                     |                     | 1.000    |
| Male                                           | 12 (54.5)           | 5 (55.6)            | 7 (53.8)            |          |
| Female                                         | 10 (45.5)           | 4 (44.4)            | 6 (46.2)            |          |
| Smoking history                                |                     |                     |                     | 0.965    |
| Never smokers                                  | 16 (72.7)           | 6 (66.7)            | 10 (76.9)           |          |
| Former or current smokers                      | 6 (27.3)            | 3 (33.3)            | 3 (23.1)            |          |
| ECOG PS                                        |                     |                     |                     | 0.304    |
| 0-1                                            | 20 (90.9)           | 7 (77.8)            | 13 (100)            |          |
| ≥ 2                                            | 2 (9.1)             | 2 (22.2)            | 0 (0)               |          |
| PD-L1 status                                   |                     |                     |                     | 0.731    |
| 1-49%                                          | 6 (27.3)            | 2 (22.2)            | 4 (30.8)            |          |
| Negative                                       | 6 (27.3)            | 2 (22.2)            | 4 (30.8)            |          |
| Unknown                                        | 10 (45.5)           | 5 (55.6)            | 5 (38.5)            |          |
| History of pulmonary resection for lung cancer |                     |                     |                     | 0.730    |
| Yes                                            | 3 (13.6)            | 2 (22.2)            | 1 (7.7)             |          |
| No                                             | 19 (86.4)           | 7 (77.8)            | 12 (92.3)           |          |
| Line of ICIs therapy                           |                     |                     |                     | 1.000    |
| First-line                                     | 5 (22.7)            | 2 (22.2)            | 3 (23.1)            |          |
| > Second-line                                  | 17 (77.3)           | 7 (77.8)            | 10 (76.9)           |          |
| Treatment data                                 |                     |                     |                     | 0.997    |
| Monotherapy                                    | 5 (22.7)            | 2 (22.2)            | 3 (23.1)            |          |
| Combination with chemotherapy                  | 12 (54.5)           | 5 (55.6)            | 7 (53.8)            |          |
| Others <sup>a</sup>                            | 5 (22.7)            | 2 (22.2)            | 3 (23.1)            |          |
| Best response to ICIs therapy                  |                     |                     |                     | 0.715    |
| PR                                             | 7 (31.8)            | 2 (22.2)            | 5 (38.5)            |          |
| SD                                             | 11 (50)             | 5 (55.6)            | 6 (46.2)            |          |
| PD                                             | 4 (18.2)            | 2 (22.2)            | 2 (15.4)            |          |
| Objective response rate, %                     | 31.8                | 22.2                | 38.5                | 0.735    |
| Disease control rate, %                        | 81.8                | 77.8                | 84.6                | 1.000    |

a, including combination with anti-angiogenesis (n=3), combination with chemotherapy plus anti-angiogenesis (n=1), or combination with chemotherapy plus *HER2*-targeting drugs (n=1).

Group a, A775\_G776insYVMA; Group b: other *HER2* variant, including Y772\_A775dup, G776 mutation, G778\_P780dup and L755P mutation.

ICIs, immune checkpoint inhibitors; ECOG PS, Eastern Cooperative Oncology Group performance status; PR, partial response; SD, stable disease; PD, progression disease.

**SupplementaryTable2.** Baseline characteristics of the entire cohort

| Variables                                      | All (%)<br>(N = 26) | Group 1<br>(N = 5) | Group 2<br>(N = 6) | Group 3<br>(N = 15) | <i>P</i> |
|------------------------------------------------|---------------------|--------------------|--------------------|---------------------|----------|
| Median age, years (range)                      | 55 (38-69)          | 57 (46-65)         | 55 (45-68)         | 53 (38-69)          |          |
| Gender                                         |                     |                    |                    |                     | 0.672    |
| Male                                           | 14 (53.8)           | 2 (40)             | 4 (66.7)           | 8 (53.3)            |          |
| Female                                         | 12 (46.2)           | 3 (60)             | 2 (33.3)           | 7 (46.70)           |          |
| Smoking history                                |                     |                    |                    |                     | 0.051    |
| Never smokers                                  | 18 (69.2)           | 5 (100)            | 2 (33.3)           | 11 (73.3)           |          |
| Former or current smokers                      | 8 (30.8)            | 0                  | 4 (66.7)           | 4 (26.7)            |          |
| ECOG PS                                        |                     |                    |                    |                     | 0.027    |
| 0-1                                            | 24 (92.3)           | 5 (100)            | 4 (66.7)           | 15 (100)            |          |
| ≥ 2                                            | 2 (7.7)             | 0                  | 2 (33.3)           | 0                   |          |
| PD-L1 status                                   |                     |                    |                    |                     | 0.623    |
| ≥50%                                           | 1 (3.8)             | 0                  | 0                  | 1 (6.7)             |          |
| 1-49%                                          | 6 (23.1)            | 0                  | 2 (33.3)           | 4 (26.7)            |          |
| Negative                                       | 8 (30.8)            | 3 (60)             | 2 (33.3)           | 3 (20)              |          |
| Unknown                                        | 11 (42.3)           | 2 (40)             | 2 (33.3)           | 7 (46.7)            |          |
| History of pulmonary resection for lung cancer |                     |                    |                    |                     | 0.652    |
| Yes                                            | 3 (11.5)            | 1 (20)             | 1 (16.7)           | 1 (6.7)             |          |
| No                                             | 23 (88.5)           | 4 (80)             | 5 (83.3)           | 14 (93.3)           |          |
| Line of ICIs therapy                           |                     |                    |                    |                     | 0.122    |
| First-line                                     | 9 (34.6)            | 2 (40)             | 0                  | 7 (46.7)            |          |
| > Second-line                                  | 17 (65.4)           | 4 (60)             | 6 (100)            | 8 (53.3)            |          |
| Treatment data                                 |                     |                    |                    |                     | 0.731    |
| Monotherapy                                    | 5 (19.2)            | 1 (20)             | 1 (16.7)           | 3 (20)              |          |
| Combination with chemotherapy                  | 16 (61.5)           | 4 (80)             | 3 (50)             | 9 (60)              |          |
| Others <sup>a</sup>                            | 5 (19.2)            | 0                  | 2 (33.3)           | 3 (20)              |          |
| Best response to ICIs therapy                  |                     |                    |                    |                     | 0.519    |
| PR                                             | 10 (38.5)           | 3 (60)             | 2 (33.3)           | 5 (33.3)            |          |
| SD                                             | 12 (46.2)           | 1 (20)             | 4 (66.7)           | 7 (46.7)            |          |
| PD                                             | 4 (15.4)            | 1 (20)             | 0                  | 3 (20)              |          |
| Objective response rate, %                     | 38.5                | 60                 | 33.3               | 33.3                | 0.545    |
| Disease control rate, %                        | 84.6                | 80                 | 100                | 80                  | 0.492    |

a, including combination with anti-angiogenesis (n=3), combination with chemotherapy plus anti-angiogenesis (n=1), or combination with chemotherapy plus *HER2*-targeting drugs (n=1). Group 1, patients received ICIs before *EGFR/HER2*-targeting drugs; Group 2, patients received ICIs after *EGFR/HER2*-targeting drugs; Group 3, patients never treated with *EGFR/HER2*-targeting drugs until their last follow-up.

ICIs, immune checkpoint inhibitors; ECOG PS, Eastern Cooperative Oncology Group performance status; PR, partial response; SD, stable disease; PD, progression disease.
